# Supplementary material for: A computational model of gene expression reveals early transcriptional events at the subtelomeric regions of the malaria parasite, Plasmodium falciparum
Source: PubMed Central journal article supplement (PMC2441474; doi:10.1186/gb-2008-9-5-r88), 2008-05-27
Supplement: gb-2008-9-5-r88-S5.pdf [file gb-2008-9-5-r88-S5.pdf]

## Animation of the intraerythrocytic development cycle based on gene activities of the *P. falciparum* genome

**Description:** The animation of the intraerythrocytic development cycle is based on gene activities of genes on the 14 nuclear chromosomes of *P. falciparum* HB3 (see also figure 3). The upper left corner displays an 'infection timer' which indicates high (red) and low (green) expression of all genes during a certain time point. The genes with strong (red dots) or weak (green dots) expression are indicated, while the diameter of the dot indicates the expression level (e.g., large green dot means very low expression). As a result we observed that subtelomeric regions show a behaviour which is clearly distinct from central chromosomal regions.

[Click 'Play' on the next page](#) to start the animation.
